# Supplementary figures and images for: Interaction of vancomycin with DNA, and determination of DNA via resonance Rayleigh scattering and resonance nonlinear scattering
Source: Royal Society of Chemistry journal article supplement (doi:10.1039/c2ay26050f), 2012-01-01

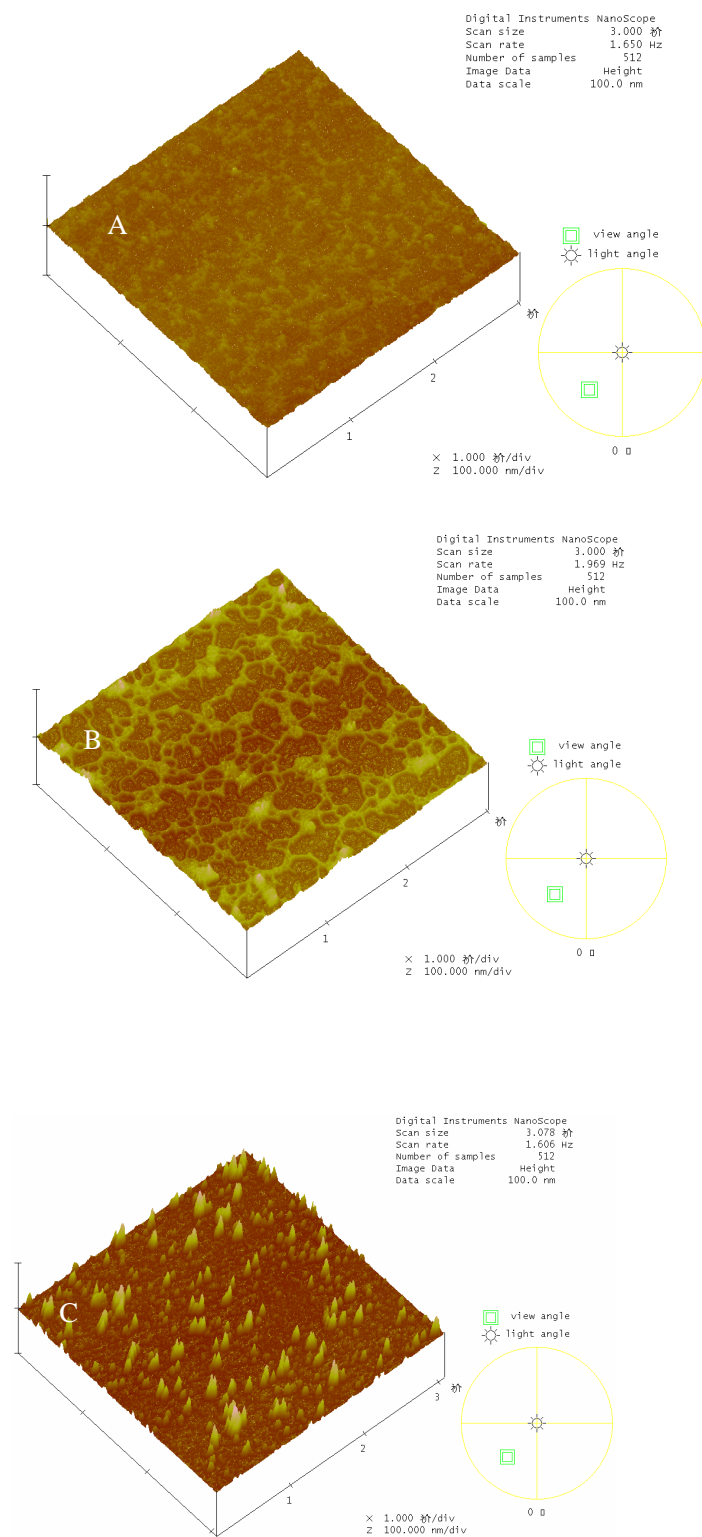

**Fig. s1** AFM 3D images of VCM(A), ctDNA (B) and VCM-ctDNA complex (C)

Supplement: c2ay26050f.pdf [file c2ay26050f.pdf]
